# Supplementary material
Source: publisher site journal article supplement (https://www.dovepress.com/article/244712)
Supplement: Supplementary file 1 [file get_supplementary_file.php]

**Figure S1 Schematic illustration** of A) Nanoencapsulation procedure of Paclitaxel in PPSu-PEG nanoparticles and B) the final core-shell structure of nanoparticles.





Figure S2 HPL chromatograms of standards solutions of Paclitaxel Active Pharmaceutical Ingredient (API): (A) 2.5, (B) 5, (C) 10, and (D) 20 ppm. The peak area, detected at 227 nm, increases proportionally with Paclitaxel concentrations.


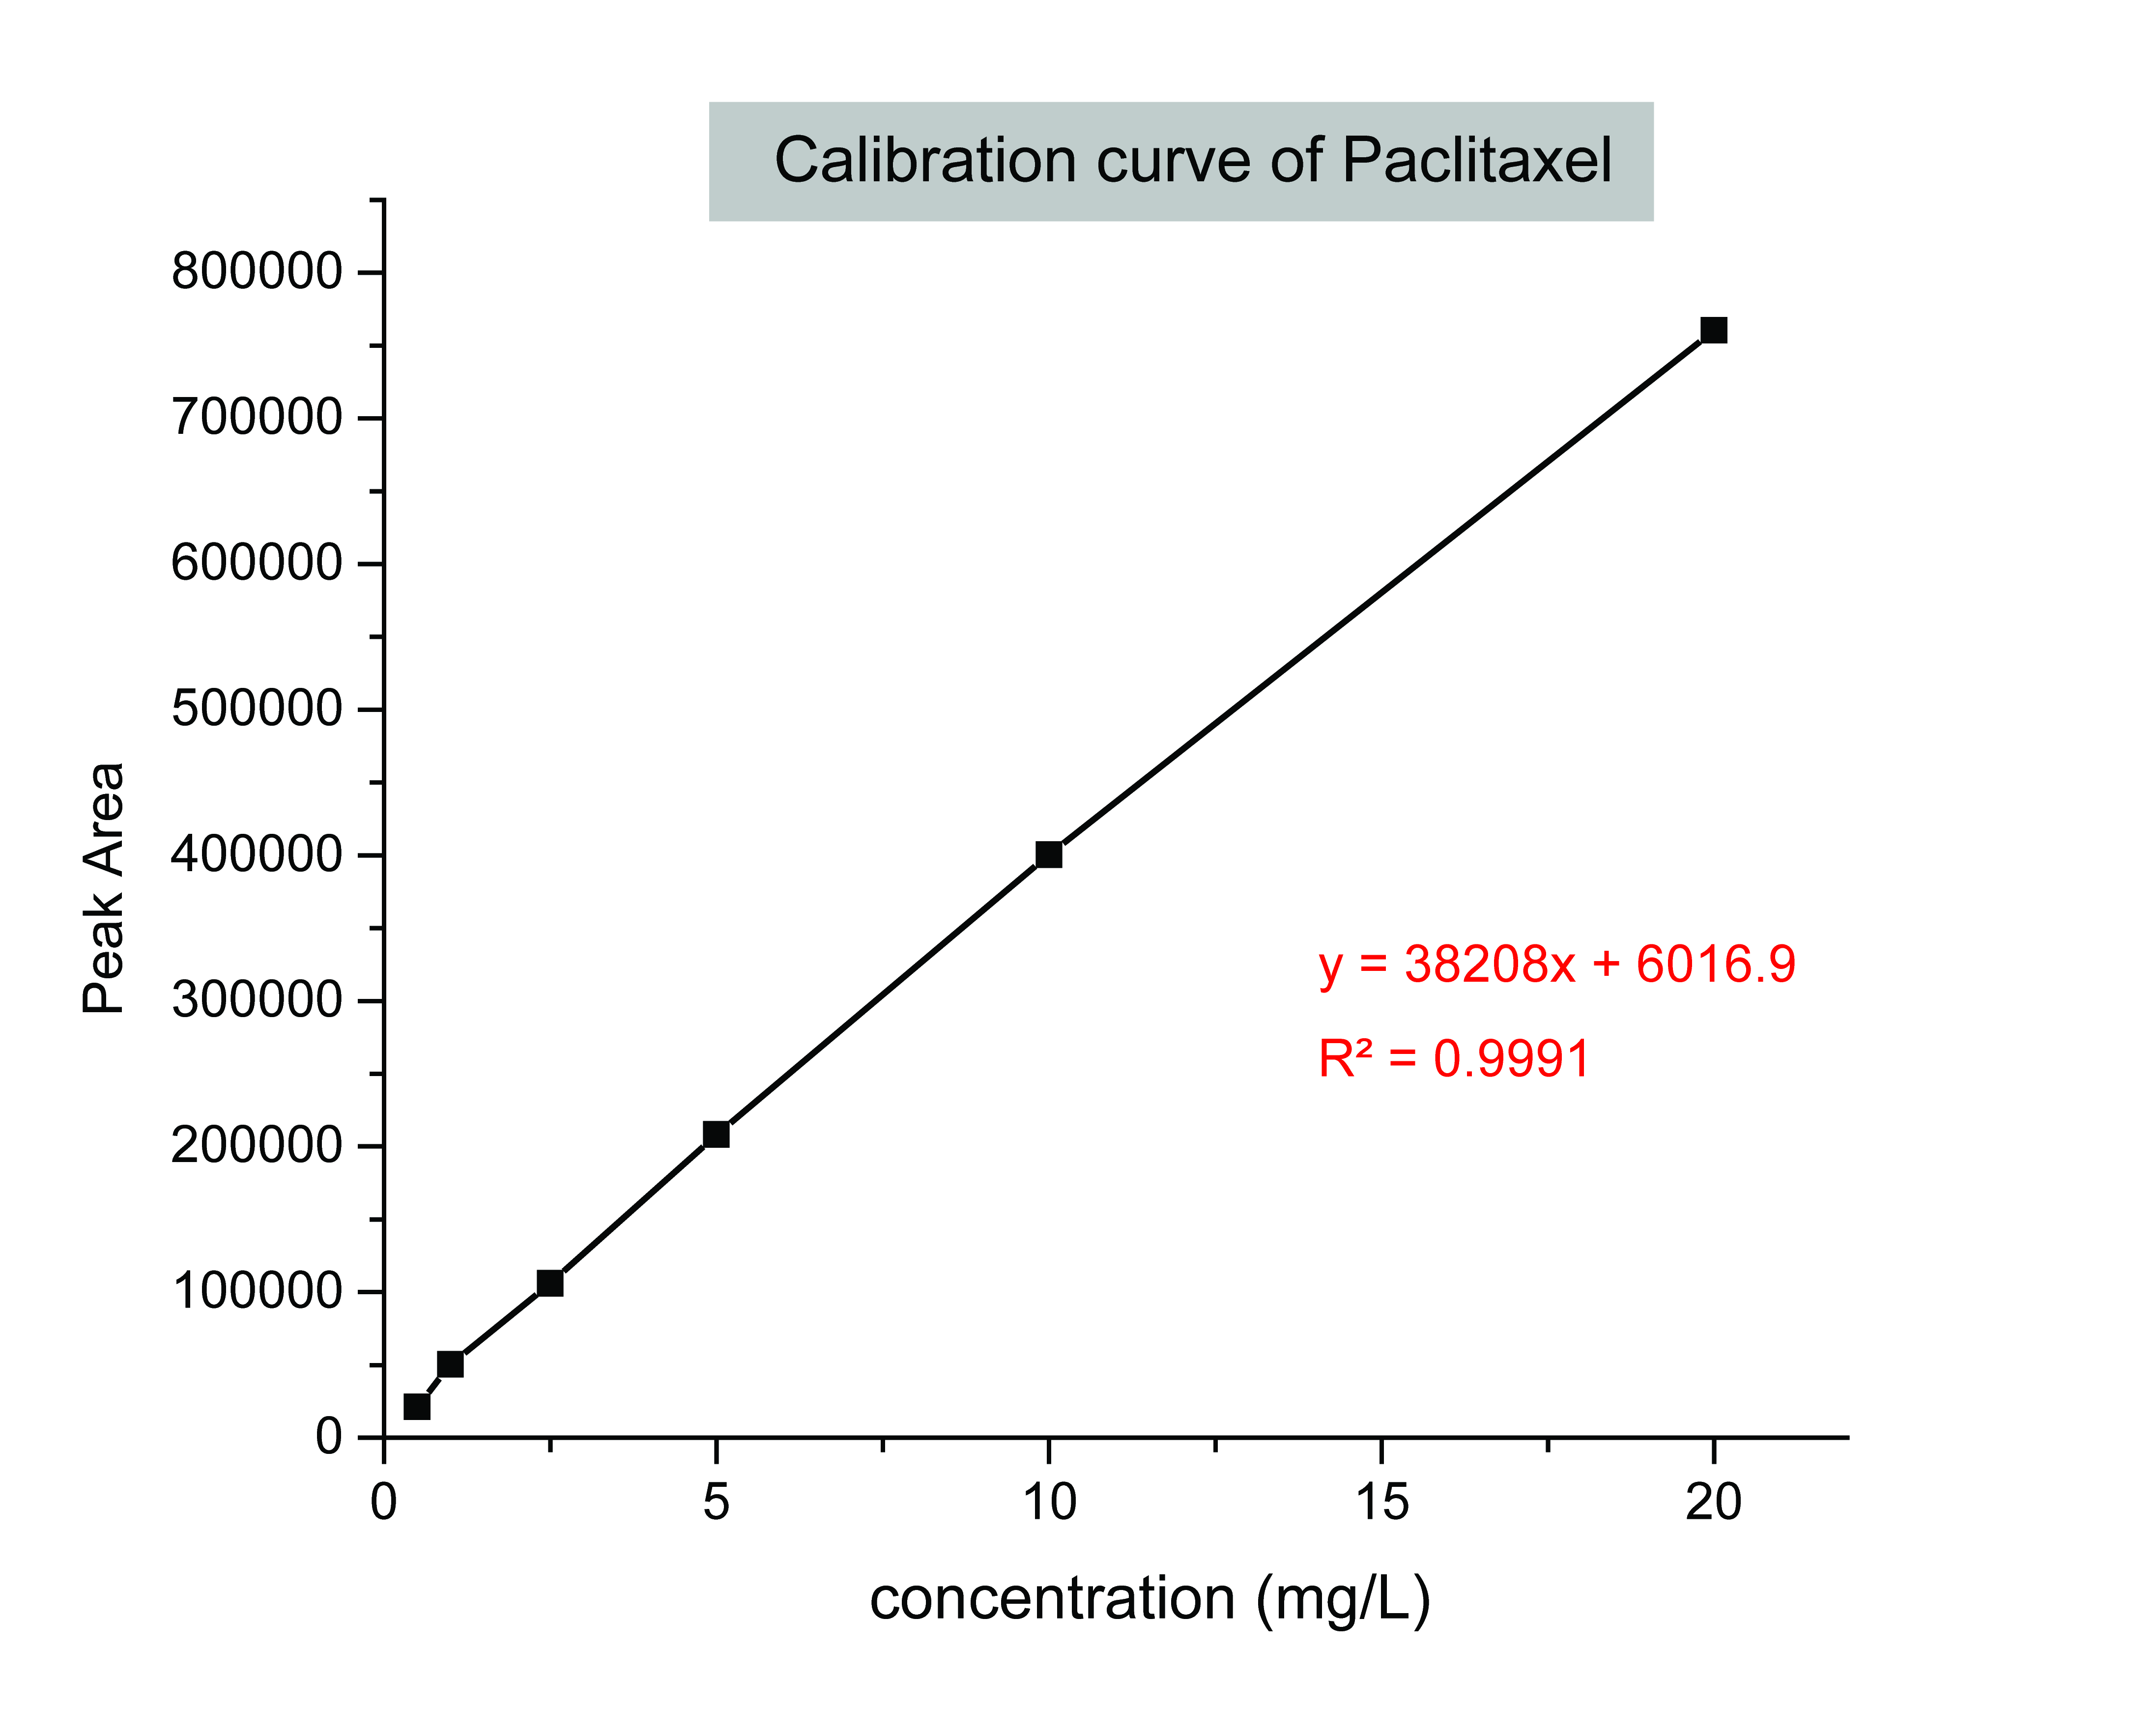


**Figure S3 Calibration curve of Paclitaxel API.** Six standard samples (20, 10, 5, 2.5, 1 and 0.5 μg/mL) were measured, to create the calibration curve.


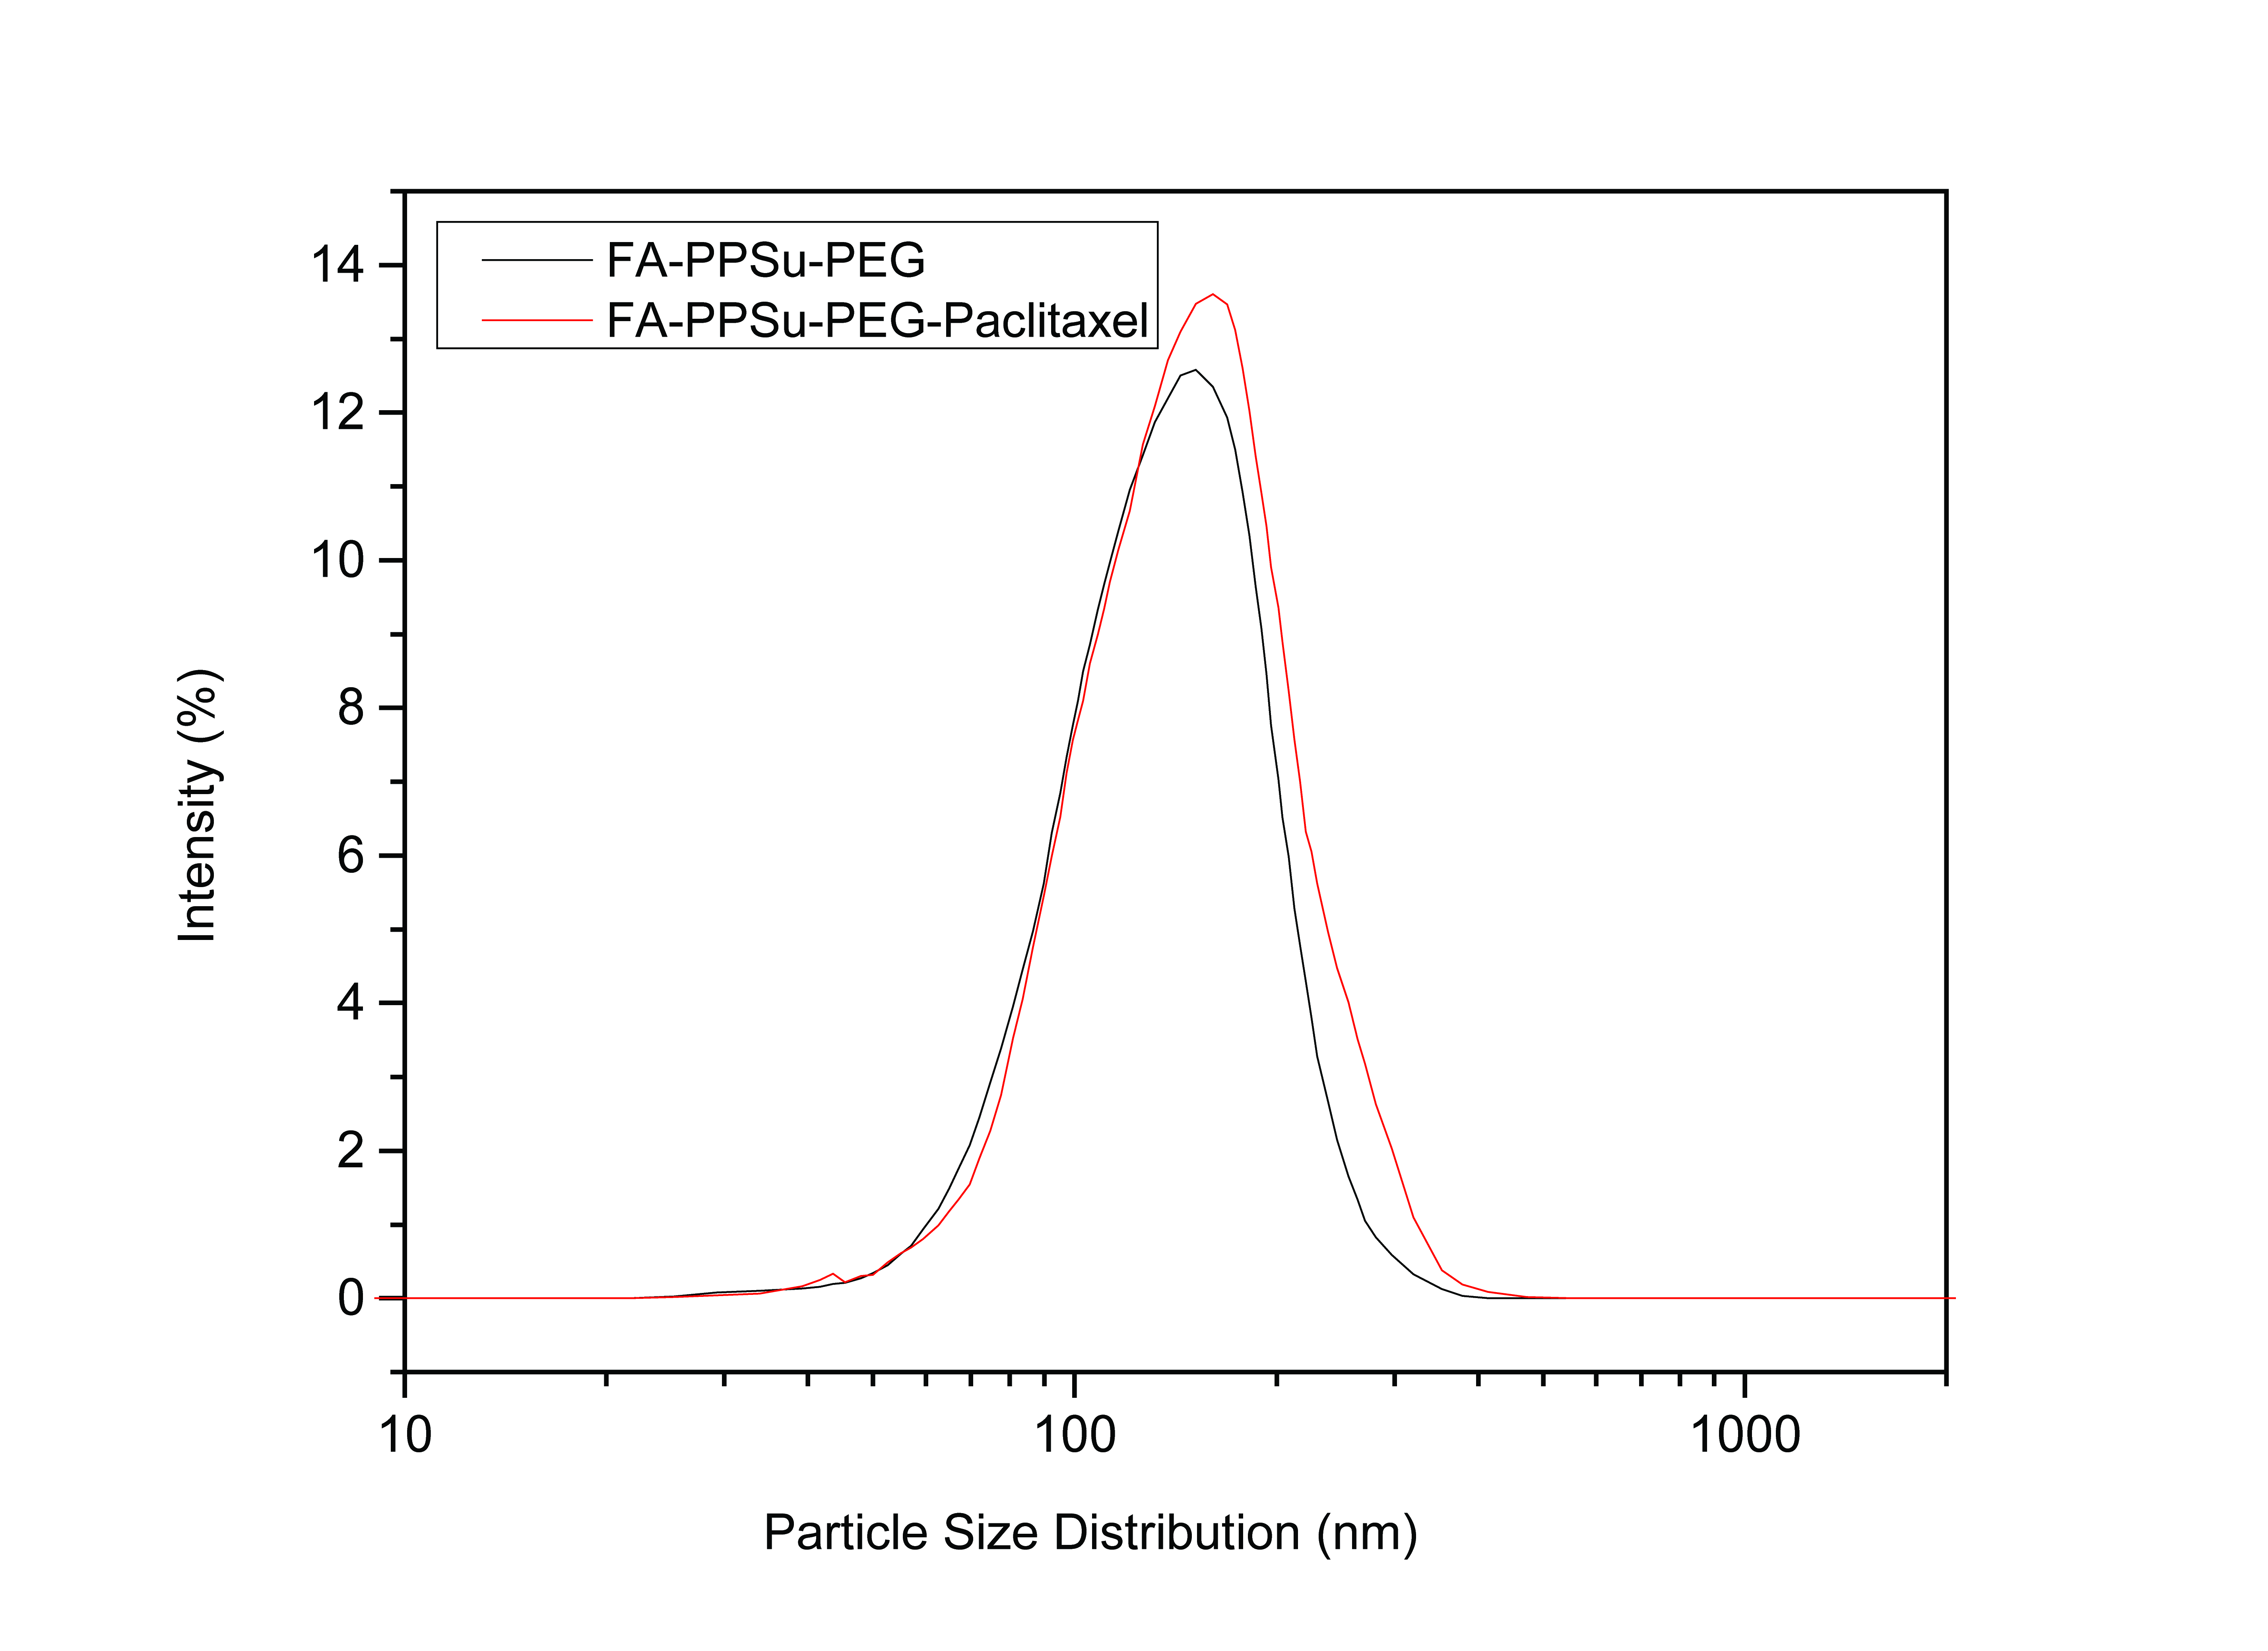


**Figure S4 Particle size distribution of neat and Paclitaxel-loaded nanoparticles as shown by DLS curves**





**Figure S5 Comparative effect of DMSO or untreated control on mitotic frequency.** HeLa K cells stably expressing GFP-α-tubulin/mcherry-H2B were imaged for 24 h with 10-minute intervals using a confocal microscope. Graph demonstrates the percentage of mitotic cells under 0.1% DMSO or in untreated conditions, as measured during 24 hours of live cell monitoring, with at least 100 cells per condition.
